# Supplementary material
Source: PubMed Central journal article supplement (PMC9201738)
Supplement: jama-e229609-s001.pdf [file jama-e229609-s001.pdf]

## Supplemental Online Content

Klompas M, Pandolfi MC, Nisar AB, Baker MA, Rhee C. Association of Omicron vs Wild-type SARS-CoV-2 Variants With Hospital-Onset SARS-CoV-2 Infections in a US Regional Hospital System. *JAMA*. Published online June 15, 2022.  
doi:10.1001/jama.2022.9609

**eTable.** Differences in Infection Control Policies Between the 2 Waves

This supplemental material has been provided by the authors to give readers additional information about their work.

**eTable.** Differences in Infection Control Policies Between the 2 Waves

| <b>Domain</b>                                       | <b>Winter #1<br/>Ancestral Strains<br/>Dec 15, 2020-<br/>Feb 28, 2021</b>                                                                                                                | <b>Winter #2<br/>Omicron Strain<br/>Dec 15, 2021-<br/>Feb 28, 2022</b>                                                                                                                   |
|-----------------------------------------------------|------------------------------------------------------------------------------------------------------------------------------------------------------------------------------------------|------------------------------------------------------------------------------------------------------------------------------------------------------------------------------------------|
| Visitor policy                                      | One essential visitor at a time plus one support person                                                                                                                                  | Dec 15-Jan 11:<br>-Two visitors per day including support personnel<br><br>Jan 12-Feb 28:<br>-One visitor per day plus one support person.                                               |
| Return to work policy for SARS-CoV-2 positive staff | Return to work 10 days after symptom onset, no test requirement.                                                                                                                         | Return to work 6 days after a positive test, negative rapid antigen test required for return to work after <10 days.                                                                     |
| Staff vaccination policy                            | Vaccines available to staff but not required.                                                                                                                                            | Full vaccination required for all staff                                                                                                                                                  |
| Mask policy                                         | Staff, patients, and visitors required to wear surgical/procedural masks during all interactions. N95 respirator required when caring for patients with suspected or confirmed COVID-19. | Staff, patients, and visitors required to wear surgical/procedural masks during all interactions. N95 respirator required when caring for patients with suspected or confirmed COVID-19. |
| Testing                                             | Testing required on admission, 72 hours after admission, for any new symptoms concerning for COVID-19, and within 72 hours of aerosol-generating procedures.                             | Testing required on admission, 72 hours after admission, for any new symptoms concerning for COVID-19, and within 72 hours of aerosol-generating procedures.                             |
